# Supplementary material
Source: PubMed Central journal article supplement (PMC4100685)
Supplement: NIHMS576171-supplement-01.pdf [file NIHMS576171-supplement-01.pdf]

Supplemental Test and Figures for the on-line version.

The following figures show chips in crowing restorations and the testing machine used in this study. Additional figures show some of the chips and their variability. Although the overall chip shapes were similar, there were some notable differences in detail between materials. The chips have been stained with a green felt tip pen to highlight the fractographic markings. Many of the photos were taken with a stereoptical microscope at magnifications of 10X to 80X to the eyes. Although the stereoptical microscope has a good depth of field, it usually was not possible to obtain focused chip photos when the specimens were tilted to show both the top and side surfaces. Thus, ten to twenty photos, all at the same magnification but with slight refocusing, were captured by the digital camera. Helicon Focus Version 5.3 software (Helicon Software, Kharkov, Ukraine) was used to stitch together the in-focus portions of each image to create a composite fully-focused image.

Supplemental Figure 1. Chips in crowns. (a) shows one formed at the margin in a Procera alumina crown.[23] The chip weakened the crown and caused it to split in half. (b) shows multiple chips (arrows) on the occlusal surface in a Cerestore alumina incisor[24] (b, courtesy S. Scherrer).

Supplemental Figure 2. Edge chipping machine. (a) shows the machine has a micropositioning X-Y stage and a moveable turret that positions the indenter or microscope directly over the spot to be indented. (b) shows a close up with a sharp conical indenter about to chip the edge of a glass plate.

Supplemental Figure 3. Chips made by sharp conical 120o indenter in the leucite glass ceramic. The specimen is tilted to show both the top indented and side surfaces. (a) shows three classical chips made at the distances shown. A damage zone underneath each indention divot is apparent as well as a pop in crack with an arrest line. A dramatic change in the crack propagation plane occurs when the crack propagates further. (b) shows three less regular shaped chips. Their variation is entirely due to variability in the orientation of the initial pop in radial cracks.

Supplemental Figure 4. Chips made by sharp conical 120o indenter in the lithium disilicate glass ceramic. These chips were very smooth due to the very fine microstructure. After pop in, along the sides the chip sides the crack propagates fairly straight to the side surface. In the bulk, the chips have a gradual bowl shape. Some Wallner and/or arrest lines mark the final stages of crack propagation. The tilted shapes to one side or another are due to variability in the initial radial crack orientations around the contact site. (b) shows some variations. Chip #12 on the right of (b) was shown in the insert of Figure 6.

Supplemental Figure 5. Chips made by sharp conical 120o indenter in the feldspathic porcelain. The three chips were made at the same distance. The variability in chip force is due in large part to variations in the initial radial crack orientations. Chip #10 had one radial crack on the right side that veered into the bulk. Final fracture was triggered by two other radial cracks that aimed towards the side surface.

Supplemental Figure 6. Top views of a feldspathic porcelain block with chips and indentations. (a) and (b) show close-ups of matched 40N and 100N indentations. There are many more long radial cracks emanating from the sharp conical 120o indentions. These images were made after the indenter was extracted and the lateral crack spalling would not likely occur for edge chips which were continuously loaded to fracture. Less force is necessary to make chips with the sharp conical 120o indenter than with the Rockwell C indenter.

Supplemental Figure 7. Chips made by the Vickers indenter in the feldspathic porcelain. Radial cracks started from the indentation corners, usually with a slight angle towards the side surface. The fracture surface is somewhat granular due to the microstructure, but overall it is relatively smooth with no undulations or shelves.

Supplemental Figure 8. Chips in the filled resin composite made with the sharp conical 120o indenter. Divot holes are larger in this soft material and many pop in cracks started towards the surface. Overall, the chips are smooth and straight along the sides, with a bowl shaped curve in the bulk leading to the surface with undulations near the final break through.

Supplemental Figure 9. Chips in the filled resin composite made with the Vickers indenter. Indentation divots are larger in this soft material and their size may be enlarged by momentary overchipping. Pop in cracks started heading directly towards the side surface. Overall, the chips are smooth with a deep bowl shaped curve leading to the surface. In a few instances, horizontal shear bands were evident near the bottom of the chip.

Supplemental Figure 10. Chips in the nanoceramic filled composite made with the sharp conical 120o indenter. Indentation divots are larger in this soft material and their size may be enlarged by momentary overchipping. Starburst pop in cracks ran either parallel to the side surface or slightly towards it. Overall, the chips are smooth with a deep bowl shaped curve in the bulk leading to the surface. Along the chip sides, the crack ran straight towards the surface. In one instance in (b), a chip propagated suddenly, but did not completely detach.

Supplemental Figure 11. Chips in the nanoceramic filled composite made with the Vickers indenter. Indentation divots are larger in this soft material and their size may be enlarged by momentary overchipping. Pop in cracks started heading directly towards the side surface. Overall, the chips are smooth with a deep bowl shaped curve with undulations leading to the surface.

Supplemental Figure 12. Chips in the 3Y-TZP zirconia made with the sharp conical 120o indenter (a), and the Vickers indenter (b). In each case, a pop in median-radial crack popped in straight into the bulk and then was arrested. This formed shelves. Further extension along the sides of the chip was straight, but in the interior, the cracks undulated dramatically. They twisted back into the bulk or out towards the surface.
